# Supplementary material for: Structural diversity in the alkaline earth metal compounds of tetra and pentacyanocyclopentadienide
Source: Royal Society of Chemistry journal article supplement (doi:10.1039/c7dt03862c), 2017-11-29
Supplement: c7dt03862c1.pdf [file c7dt03862c1.pdf]

Structural diversity in the alkaline earth metal compounds of tetra- and pentacyanocyclopentadienide

*Karlheinz Sünkel\* and Patrick R. Nimax*

**SUPPORTING INFORMATION**

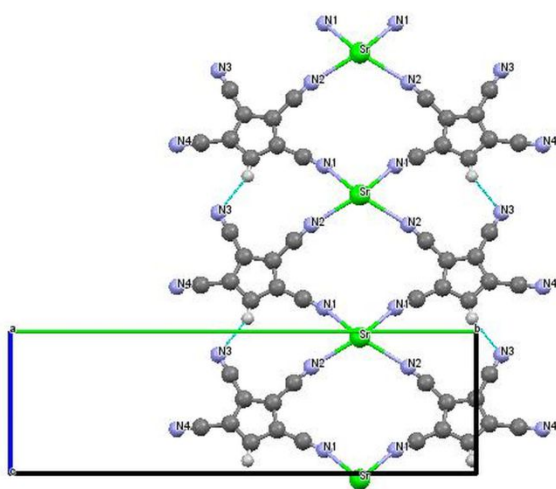

Figure SI 1: Sr(TCC)<sub>4/2</sub> ribbon in  $2c'$ , shown with  $y = 0.75$ , viewed down the  $a$ -axis.

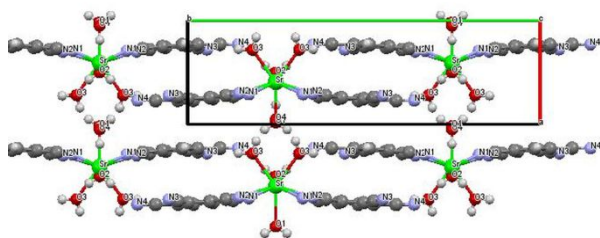

Figure SI 2: The H-bond network connecting the different Sr(TCC)<sub>4/2</sub> ribbons, viewed down the  $c$ -axis.

| compound                                         | <b>1a'</b>                                                        | <b>1b</b>                                                        | <b>2b'</b>                                                      | <b>2c'</b>                                                       | <b>2d'</b>                                                     |
|--------------------------------------------------|-------------------------------------------------------------------|------------------------------------------------------------------|-----------------------------------------------------------------|------------------------------------------------------------------|----------------------------------------------------------------|
| Temperature (K)                                  | 100                                                               | 173                                                              | 293                                                             | 100                                                              | 100                                                            |
| Empirical formula                                | C <sub>20</sub> H <sub>20</sub> MgN <sub>10</sub> O <sub>10</sub> | C <sub>20</sub> H <sub>12</sub> CaN <sub>10</sub> O <sub>6</sub> | C <sub>18</sub> H <sub>12</sub> CaN <sub>8</sub> O <sub>5</sub> | C <sub>18</sub> H <sub>12</sub> N <sub>8</sub> O <sub>5</sub> Sr | C <sub>18</sub> H <sub>8</sub> BaN <sub>8</sub> O <sub>3</sub> |
| M                                                | 584.77                                                            | 528.48                                                           | 460.44                                                          | 507.98                                                           | 521.66                                                         |
| Crystal system                                   | monoclinic                                                        | orthorhombic                                                     | monoclinic                                                      | monoclinic                                                       | orthorhombic                                                   |
| Space group                                      | P2 <sub>1</sub> /c                                                | P2 <sub>1</sub> 2 <sub>1</sub> 2 <sub>1</sub>                    | P2 <sub>1</sub> /m                                              | P2 <sub>1</sub> /m                                               | Pnb2 <sub>1</sub>                                              |
| Crystal size (mm)                                | 0.1 x 0.09 x 0.08                                                 | 0.1 x 0.1 x 0.05                                                 | 0.07 x 0.05 x 0.04                                              | 0.1 x 0.09 x 0.08                                                | 0.04 x 0.02 x 0.02                                             |
| <i>a</i> (Å)                                     | 12.1470(3)                                                        | 11.0319(5)                                                       | 7.1830(2)                                                       | 7.2643(2)                                                        | 6.8320(2)                                                      |
| <i>b</i> (Å)                                     | 6.6285(2)                                                         | 12.4908(5)                                                       | 21.9235(8)                                                      | 22.2182(7)                                                       | 13.8221(4)                                                     |
| <i>c</i> (Å)                                     | 17.9227(5)                                                        | 17.7452(8)                                                       | 7.4531(3)                                                       | 7.5502(2)                                                        | 21.1263(5)                                                     |
| $\beta$ [°]                                      | 97.4580(10)°                                                      | 90                                                               | 115.6950(10)                                                    | 116.1240(10)                                                     | 90                                                             |
| <i>V</i> [Å <sup>3</sup> ]                       | 1430.86(7)                                                        | 2445.24(18)                                                      | 1057.63(7)                                                      | 1094.11(5)                                                       | 1995.01(9)                                                     |
| <i>Z</i>                                         | 2                                                                 | 4                                                                | 2                                                               | 2                                                                | 4                                                              |
| <i>D<sub>c</sub></i> [g/dm <sup>3</sup> ]        | 1.357                                                             | 1.436                                                            | 1.446                                                           | 1.542                                                            | 1.737                                                          |
| F (000)                                          | 604                                                               | 1080                                                             | 472                                                             | 508                                                              | 1008                                                           |
| $\mu$ (MoK $\alpha$ ) [mm <sup>-1</sup> ]        | 0.130                                                             | 0.314                                                            | 0.345                                                           | 2.510                                                            | 2.028                                                          |
| Absorption correction                            | Semi-empirical from equivalents                                   |                                                                  |                                                                 |                                                                  |                                                                |
| T <sub>max</sub> /T <sub>min</sub>               | 0.7454/0.7147                                                     | 0.7452/0.7039                                                    | 0.7456/0.6696                                                   | 0.6468/0.5896                                                    | 0.7456/0.6851                                                  |
| no. of total reflections                         | 24200                                                             | 39685                                                            | 18543                                                           | 21595                                                            | 36043                                                          |
| Data / restraints / parameters                   | 2935 / 0 / 227                                                    | 4490 / 0 / 382                                                   | 2430 / 0 / 177                                                  | 2588 / 0 / 173                                                   | 4557 / 16 / 299                                                |
| R1 [ <i>I</i> >2 $\sigma$ ( <i>I</i> )]          | 0.0318                                                            | 0.0239                                                           | 0.0492                                                          | 0.0205                                                           | 0.0154                                                         |
| wR2 (all data)                                   | 0.0970                                                            | 0.0544                                                           | 0.0800                                                          | 0.0520                                                           | 0.0363                                                         |
| GOOF                                             | 1.252                                                             | 1.054                                                            | 1.132                                                           | 1.183                                                            | 1.039                                                          |
| Largest diff. peak and hole [e Å <sup>-3</sup> ] | 0.358 and -0.195                                                  | 0.179 and -0.172                                                 | 0.334 and -0.278                                                | 0.421 and -0.391                                                 | 0.275 and -0.419                                               |
| CCDC-#                                           | 1569428                                                           | 1569429                                                          | 1569430                                                         | 1569431                                                          | 1569432                                                        |

Table S11: Experimental details for the crystal structure determinations.
